# Supplementary material
Source: publisher site journal article supplement (http://spandidos-publications.com/4216/downloadSupplementary)

Figure S1. Representative Sanger sequencing trace for a human papilloma virus-16 positive cancer tissue sample.

File: D01\_KCa24T\_009.ab1 Run ended: Sep 21, 2017,17:18:58 Signal G:758 A: 1546 T:3272 C:1545 Sample: KCa24T

Lane: 9 Base spacing: 9.97 294 bases in 3543 scans

Page 1 of 1

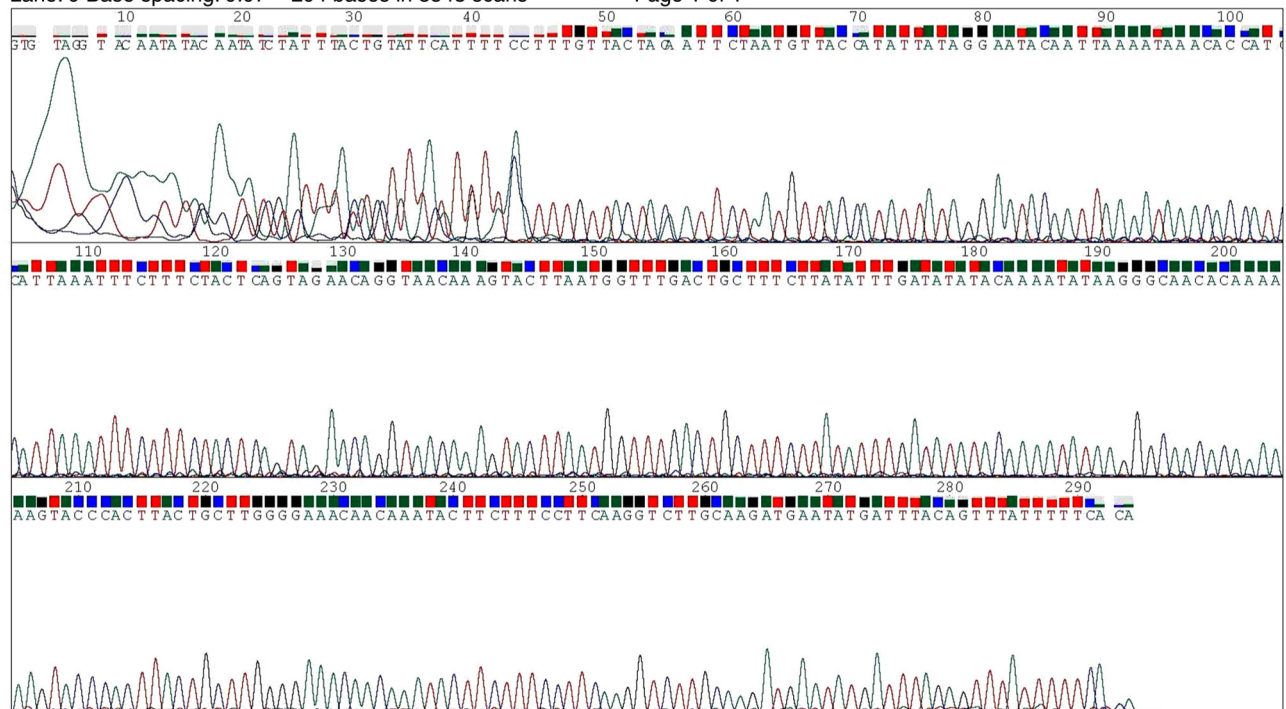

Supplement: Supplementary file 1 [file downloadSupplementary]
